# Supplementary material for: Mechanism of Phase Separation in Aqueous Two-Phase Systems
Source: MDPI journal article supplement (doi:10.3390/ijms232214366), 2022-11-19
Supplement: s1 [file s1]

## Supplementary Data for Mechanism of phase separation in aqueous two-phase systems

Amber R Titus, Pedro P Madeira, Luisa A Ferreira, Vladimir Y Chernyak, Vladimir N Uversky, Boris Y Zaslavsky

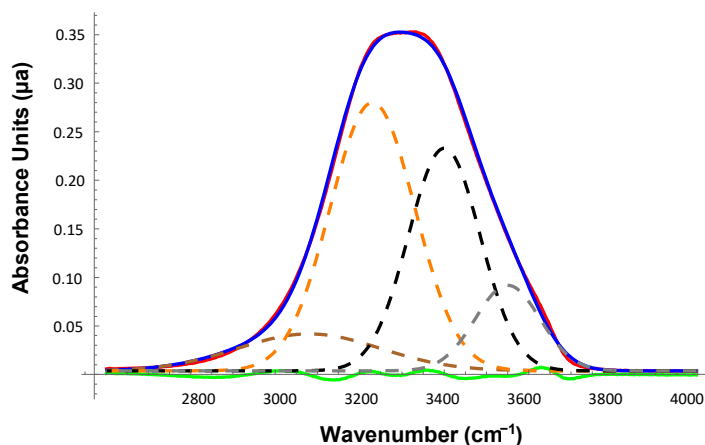

**Figure S1.** Example of the ATR-FTIR spectra of OH-stretch band in the solvent for 0.15 M NaCl in 0.01 M Na-phosphate buffer, pH 7.4 (PBS) adapted from [1]. The blue line is the measured absorption spectrum, and the red envelope is the best fit of the sum of four Gaussian components (dashed lines at positions (3080  $\text{cm}^{-1}$  (dark orange), 3230  $\text{cm}^{-1}$  (orange), 3400  $\text{cm}^{-1}$  (black), and 3550  $\text{cm}^{-1}$  (gray)). Experimental data and fit are visually almost indistinguishable.

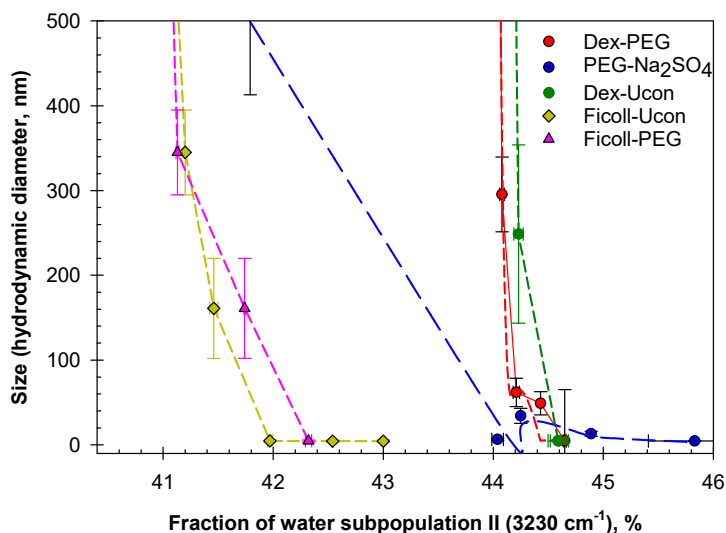

**Figure S2.** Size of agglomerates  $<500$  nm formed in the mixtures of Dextran-75/PEG-8000 (red), PEG-8000/ $\text{Na}_2\text{SO}_4$  (blue), Dextran-75/Ucon-3930 (dark green), Ficoll-70/Ucon-3930 (yellow), and Ficoll-70/PEG-8000 (pink) as a function of the fraction of the water subpopulation II in the mixtures. Data taken from Figure 9 in the main text.

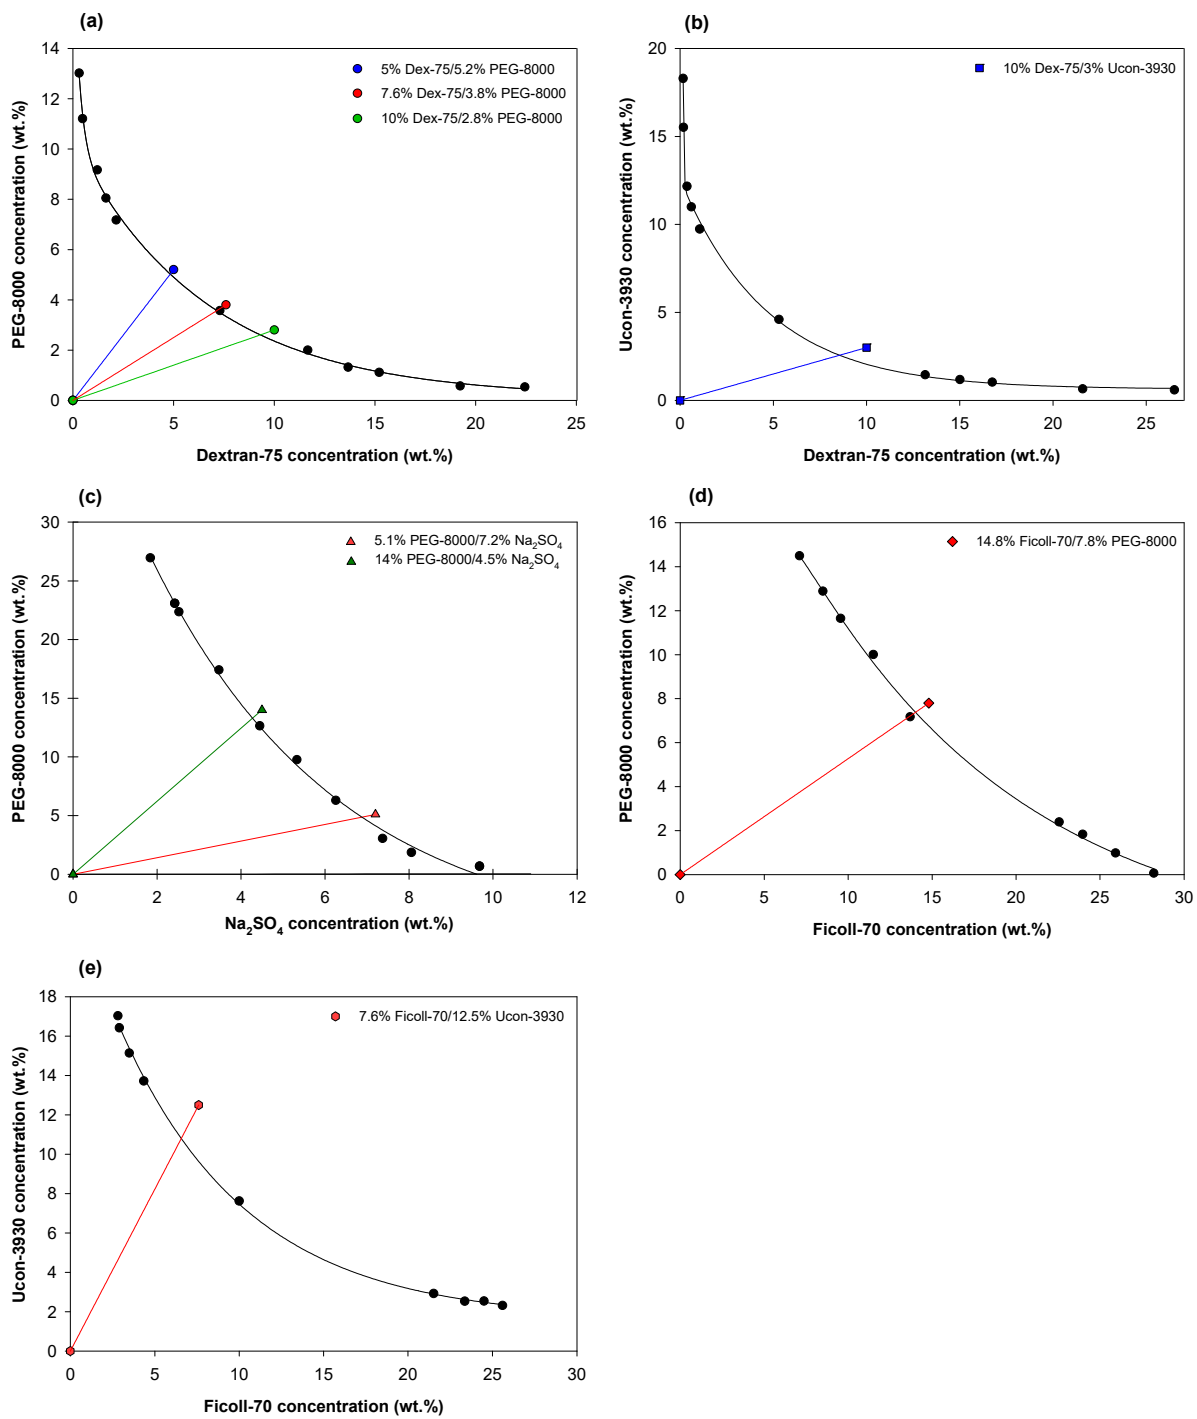

**Figure S3.** Phase diagrams of (a) Dextran-75/PEG-8000, (b) Dextran-75/Ucon-3930, (c) PEG-8000/Na<sub>2</sub>SO<sub>4</sub>, (d) Ficoll-70/PEG-8000, and (e) Ficoll-70/Ucon-3930 adapted from [2].

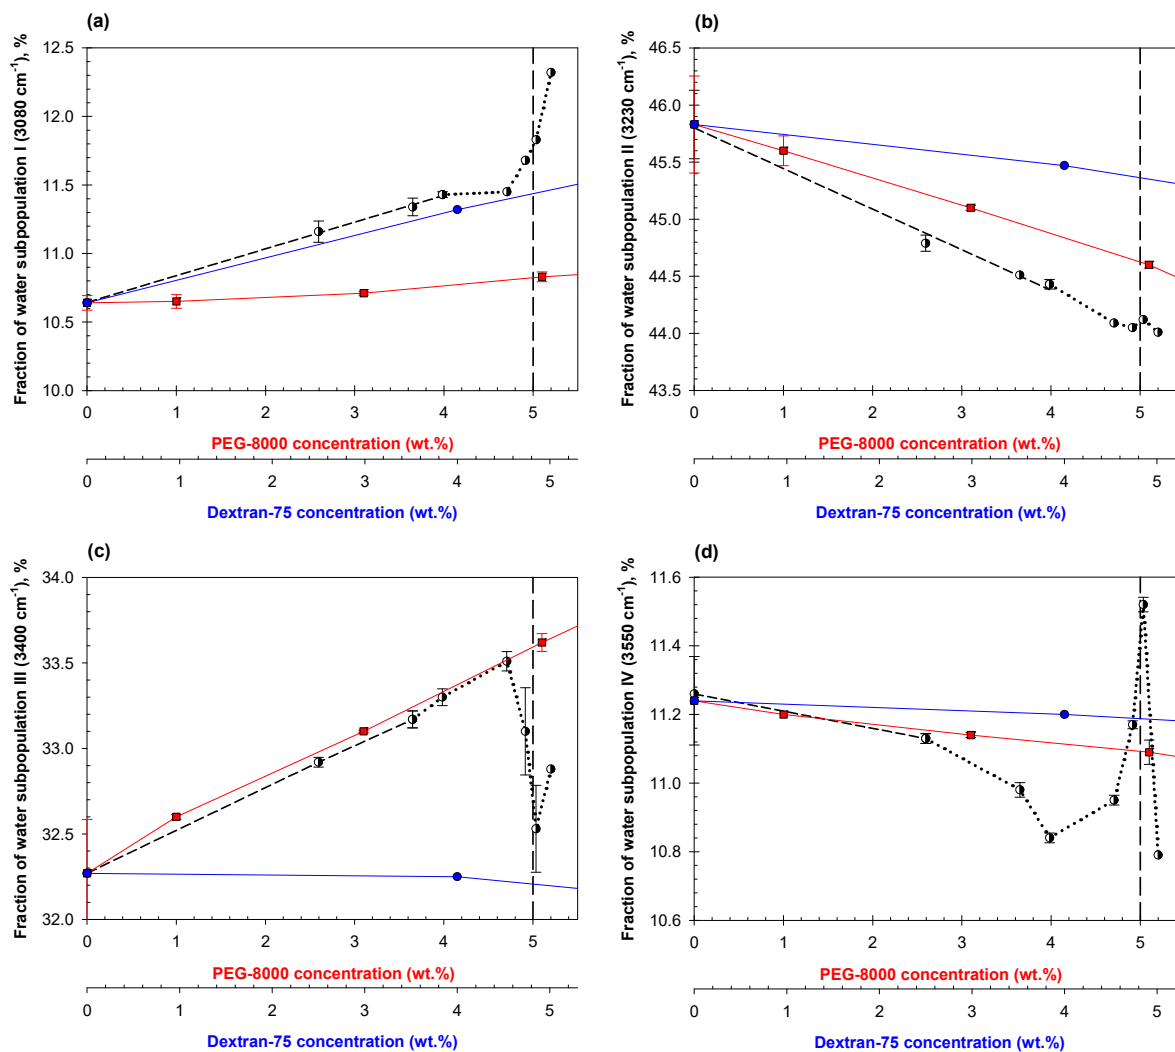

**Figure S4.** Concentration dependences of the water subpopulation fractions represented by the relative contribution of Gaussian components I (a), II (b), III (c), IV (d) on dilutions of mixed ATPS in PBS consisting of 5% Dextran / 5.2% PEG (black), PEG-8000 in PBS (red squares), and Dextran-75 in PBS (blue circles). The vertical dashed line represents the estimated disruption point of this system according to its phase diagram.

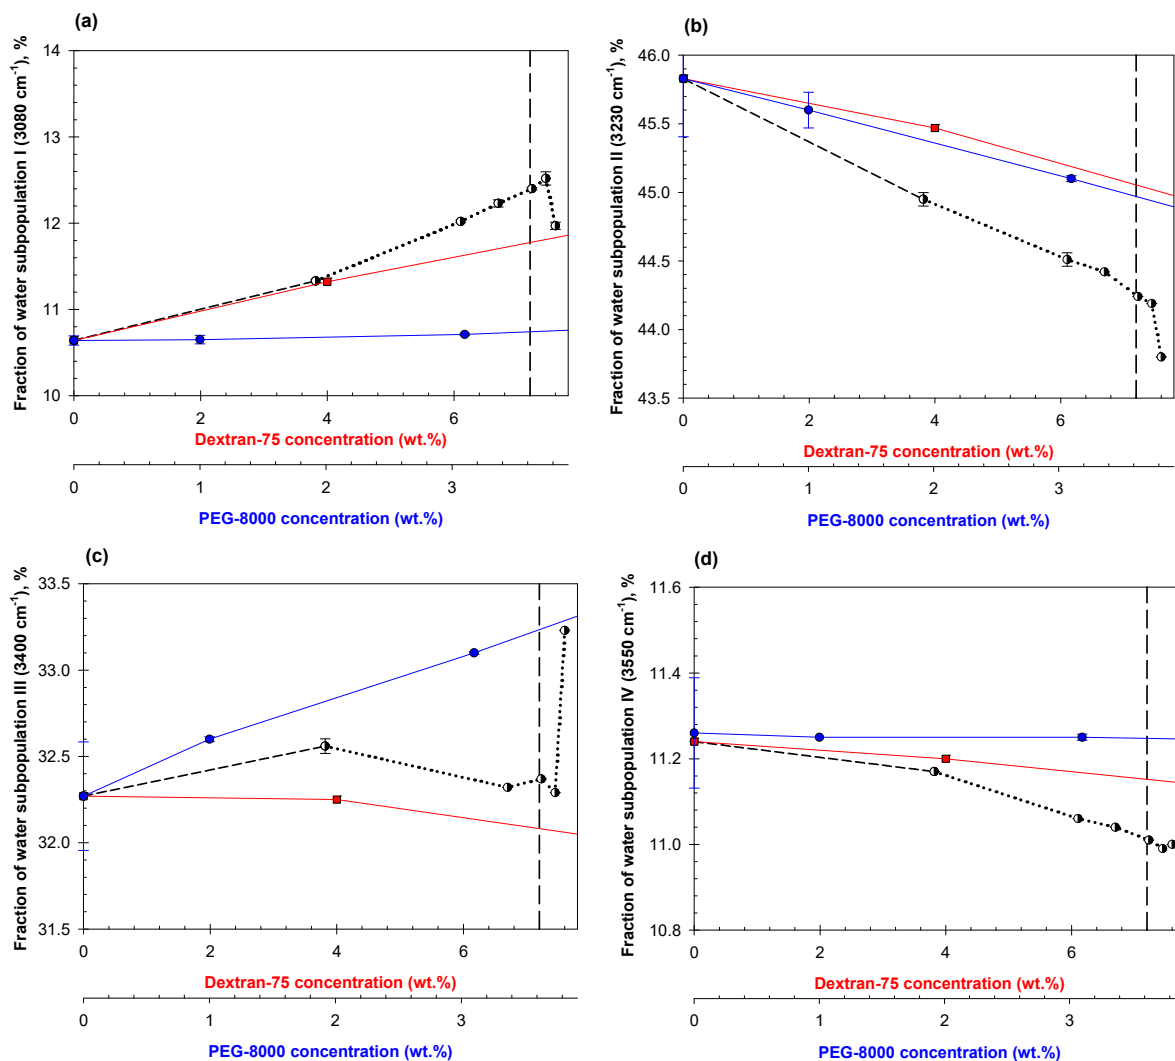

**Figure S5.** Concentration dependences of the water subpopulations fractions represented by the relative contribution of Gaussian components I (a), II (b), III (c), IV (d) on dilutions of mixed ATPS in PBS consisting of 7.6% Dextran / 3.8% PEG (black), Dextran-75 in PBS (red squares), and PEG-8000 in PBS (blue circles). The vertical dashed line represents the estimated disruption point of this system according to its phase diagram.

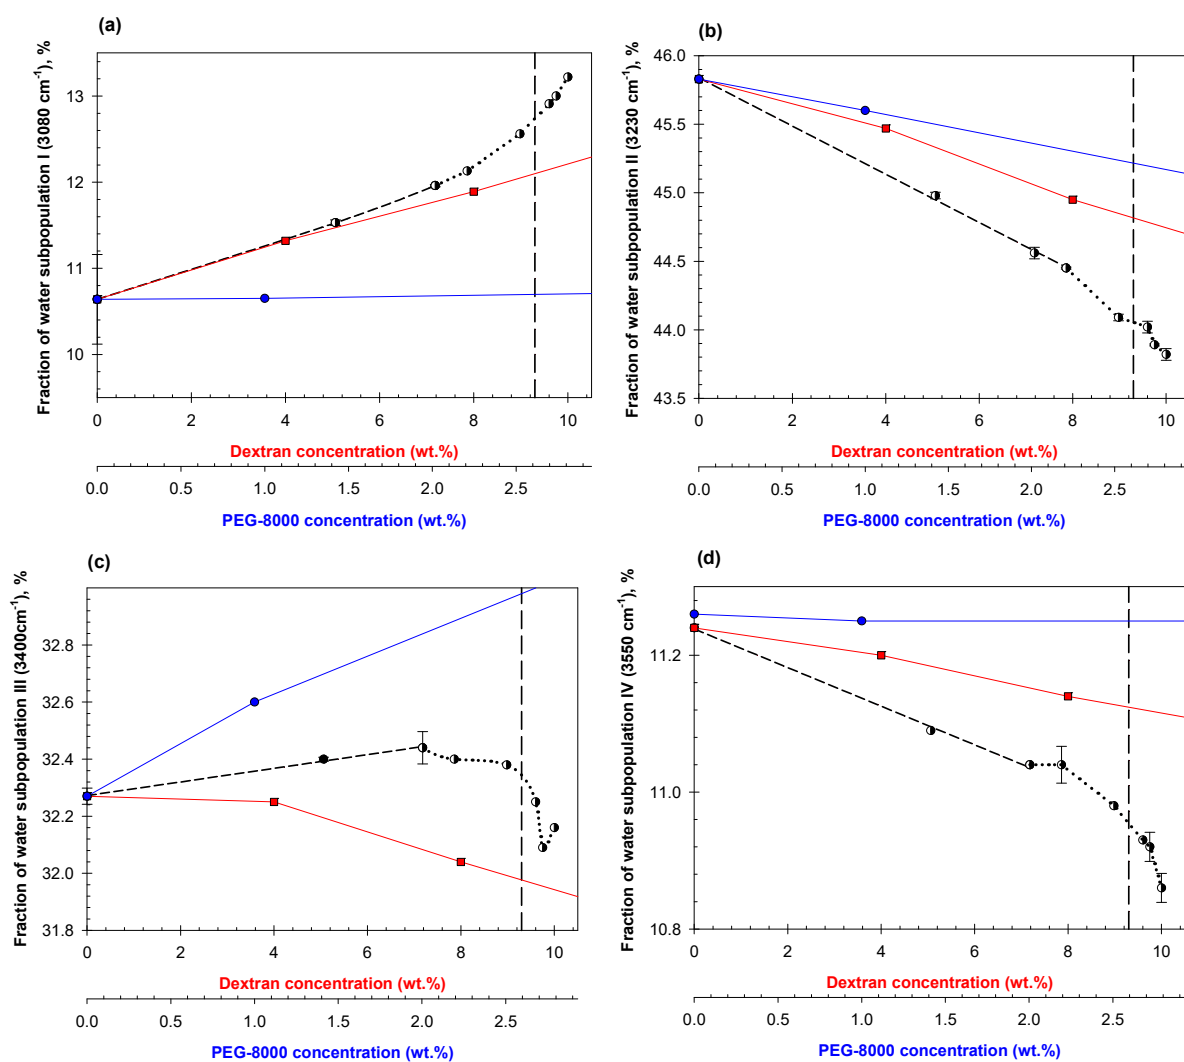

**Figure S6.** Concentration dependences of the water subpopulations fractions represented by the relative contribution of Gaussian components I (a), II (b), III (c), IV (d) on dilutions of mixed ATPS in PBS consisting of 10% Dextran / 2.8% PEG (black), Dextran-75 in PBS (red squares), and PEG-8000 in PBS (blue circles). The vertical dashed line represents the estimated disruption point of this system according to its phase diagram.

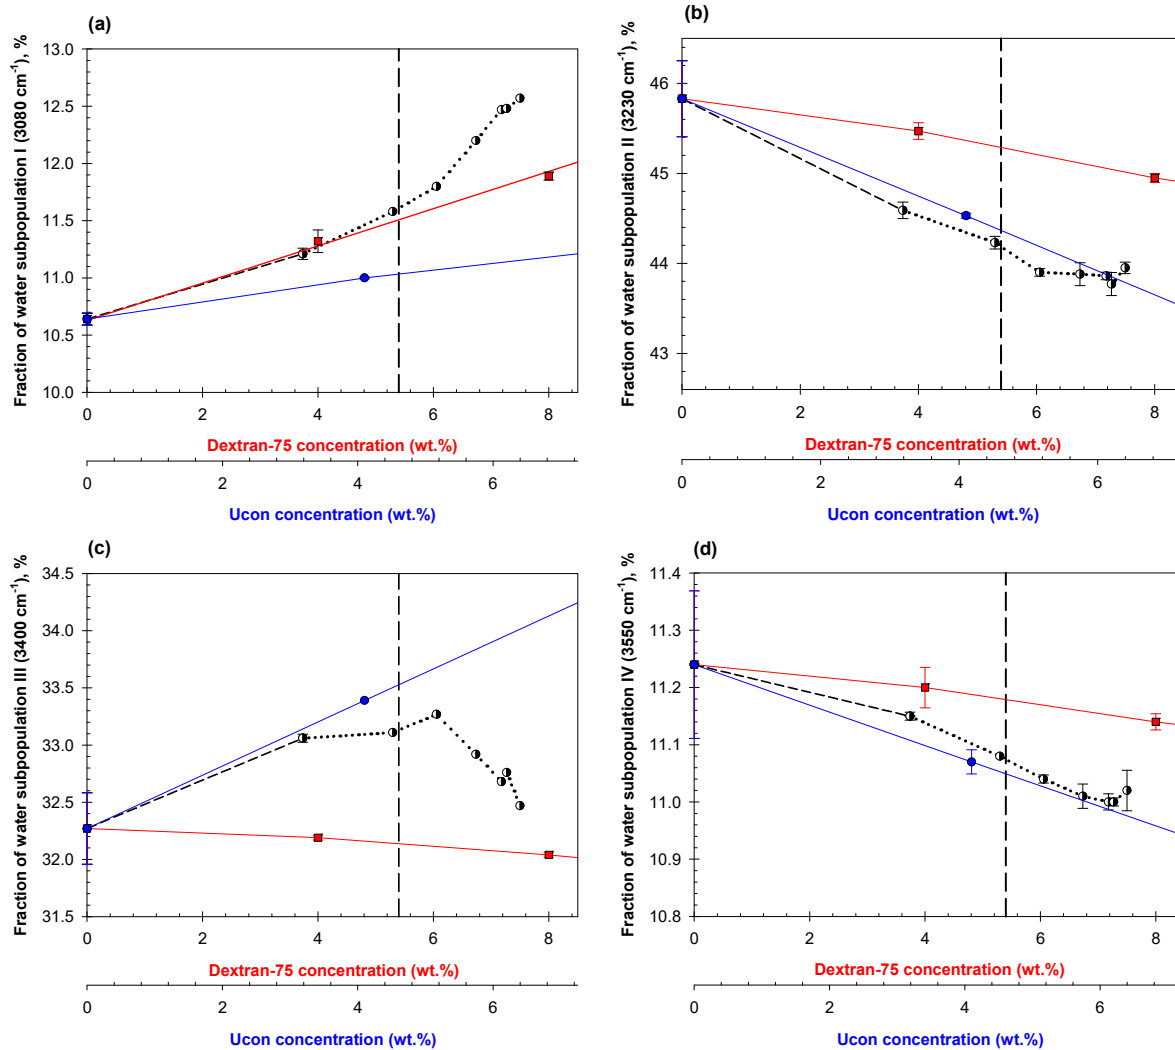

**Figure S7.** Concentration dependences of the water subpopulations fractions represented by the relative contribution of Gaussian components I (a), II (b), III (c), IV (d) on dilutions of mixed ATPS in PBS consisting of 7.5% Dextran / 6.2% Ucon (black), Dextran-75 in PBS (red squares), and Ucon-3930 in PBS (blue circles). The vertical dashed line represents the estimated disruption point of this system according to its phase diagram.

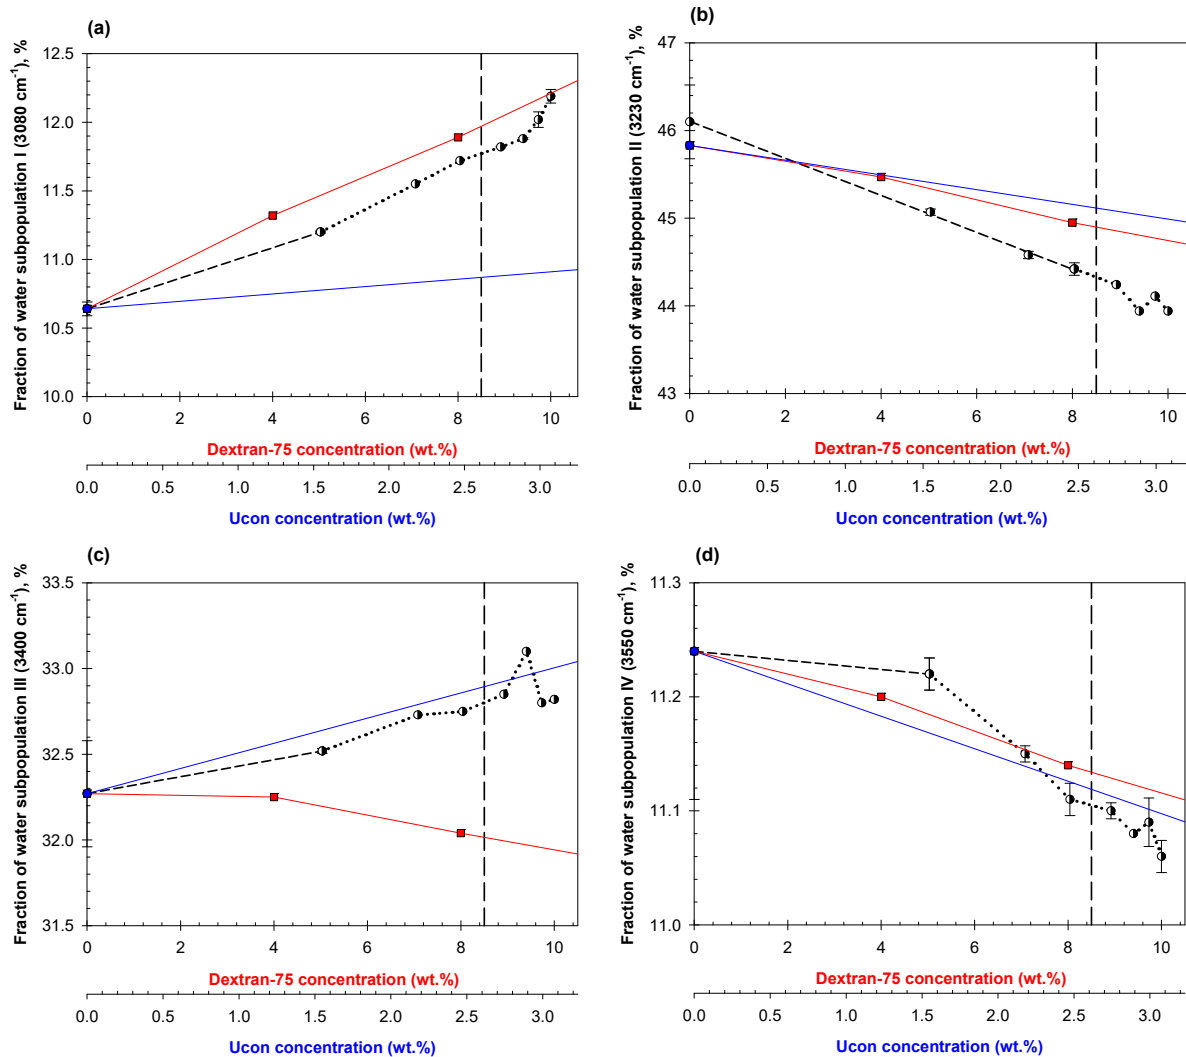

**Figure S8.** Concentration dependences of the water subpopulations fractions represented by the relative contribution of Gaussian components I (a), II (b), III (c), IV (d) on dilutions of mixed ATPS in PBS consisting of 10% Dextran / 3% Ucon (black), Dextran-75 in PBS (red squares), and Ucon-3930 in PBS (blue circles). The vertical dashed line represents the estimated disruption point of this system according to its phase diagram.

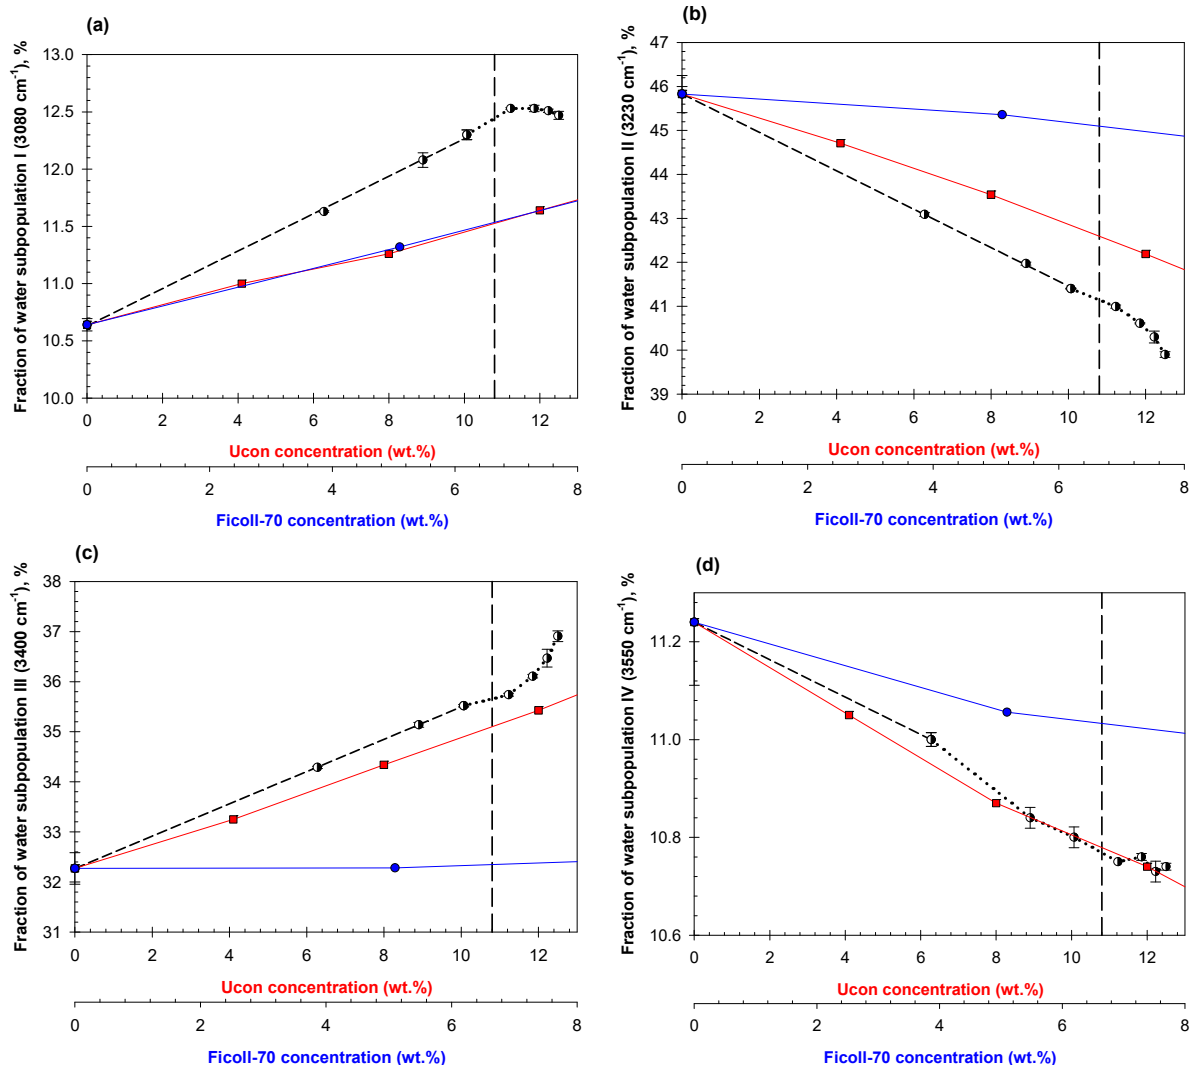

**Figure S9.** Concentration dependences of the water subpopulations fractions represented by the relative contribution of Gaussian components I (a), II (b), III (c), IV (d) on dilutions of mixed ATPS in PBS consisting of 7.6% Ficoll / 12.5% Ucon (black), Ucon-3930 in PBS (red squares), and Ficoll-70 in PBS (blue circles). The vertical dashed line represents the estimated disruption point of this system according to its phase diagram.



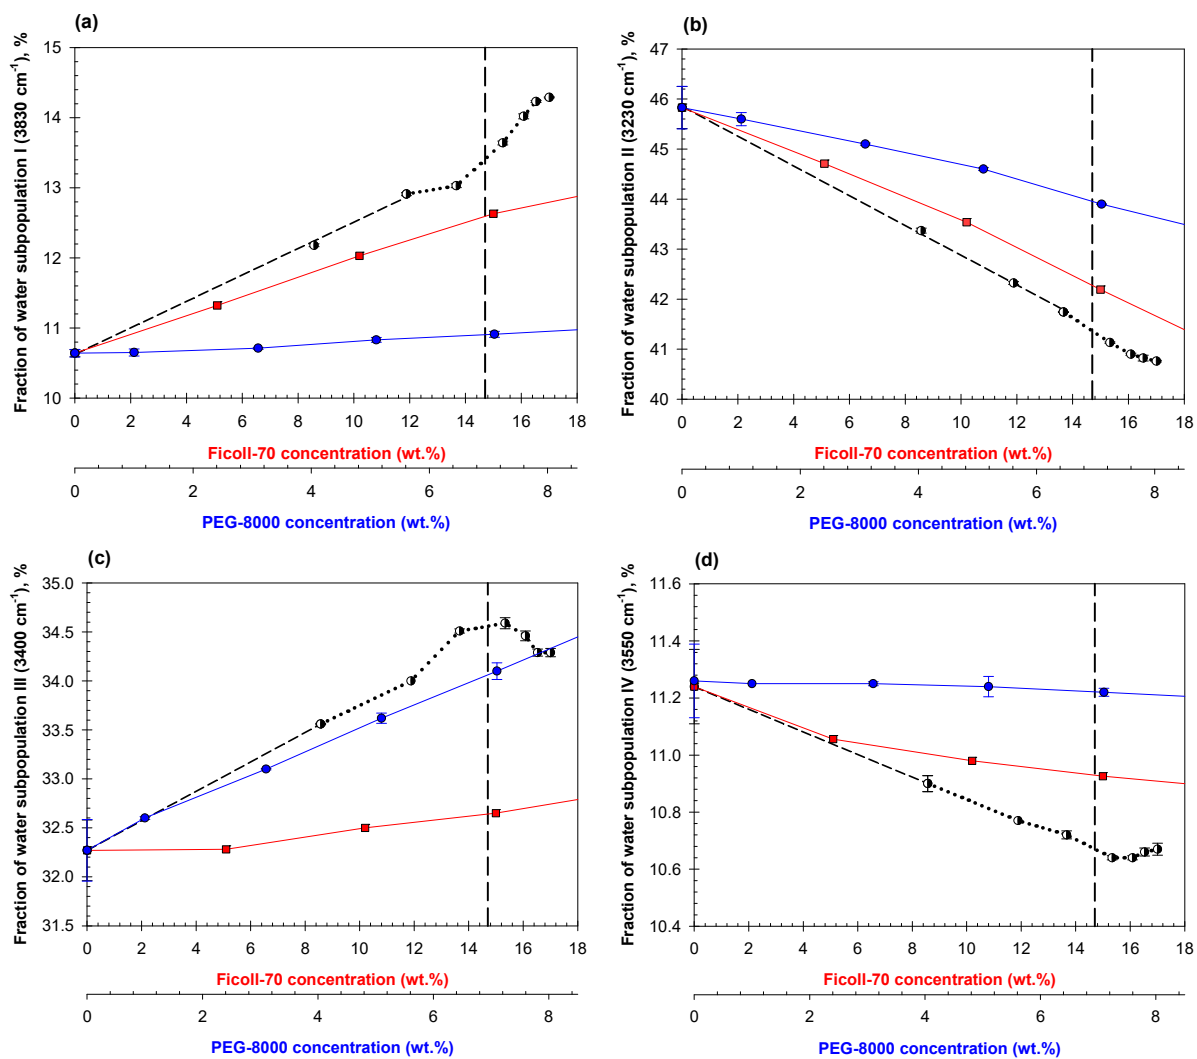

**Figure S10.** Concentration dependences of the water subpopulations fractions represented by the relative contribution of Gaussian components I (a), II (b), III (c), IV (d) on dilutions of mixed ATPS in PBS consisting of 17% Ficoll / 8% PEG (black), Ficoll-70 in PBS (red squares), and PEG-8000 in PBS (blue circles). The vertical dashed line represents the estimated disruption point of this system according to its phase diagram.

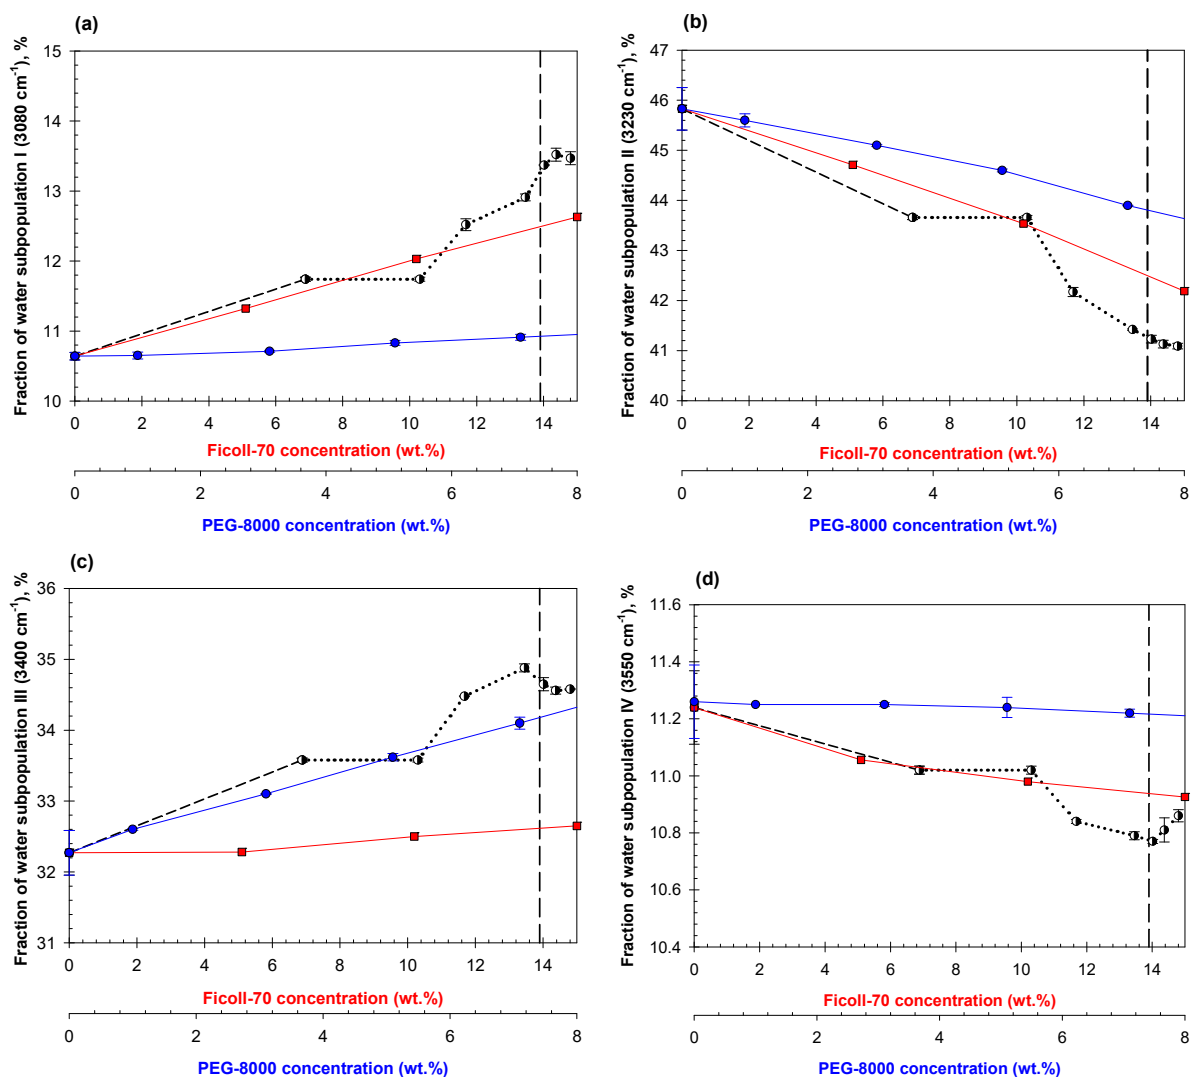

**Figure S11.** Concentration dependences of the water subpopulations fractions represented by the relative contribution of Gaussian components I (a), II (b), III (c), IV (d) on dilutions of mixed ATPS in PBS consisting of 14.8% Ficoll / 7.8% PEG (black), Ficoll-70 in PBS (red squares), and PEG-8000 in PBS (blue circles). The vertical dashed line represents the estimated disruption point of this system according to its phase diagram.

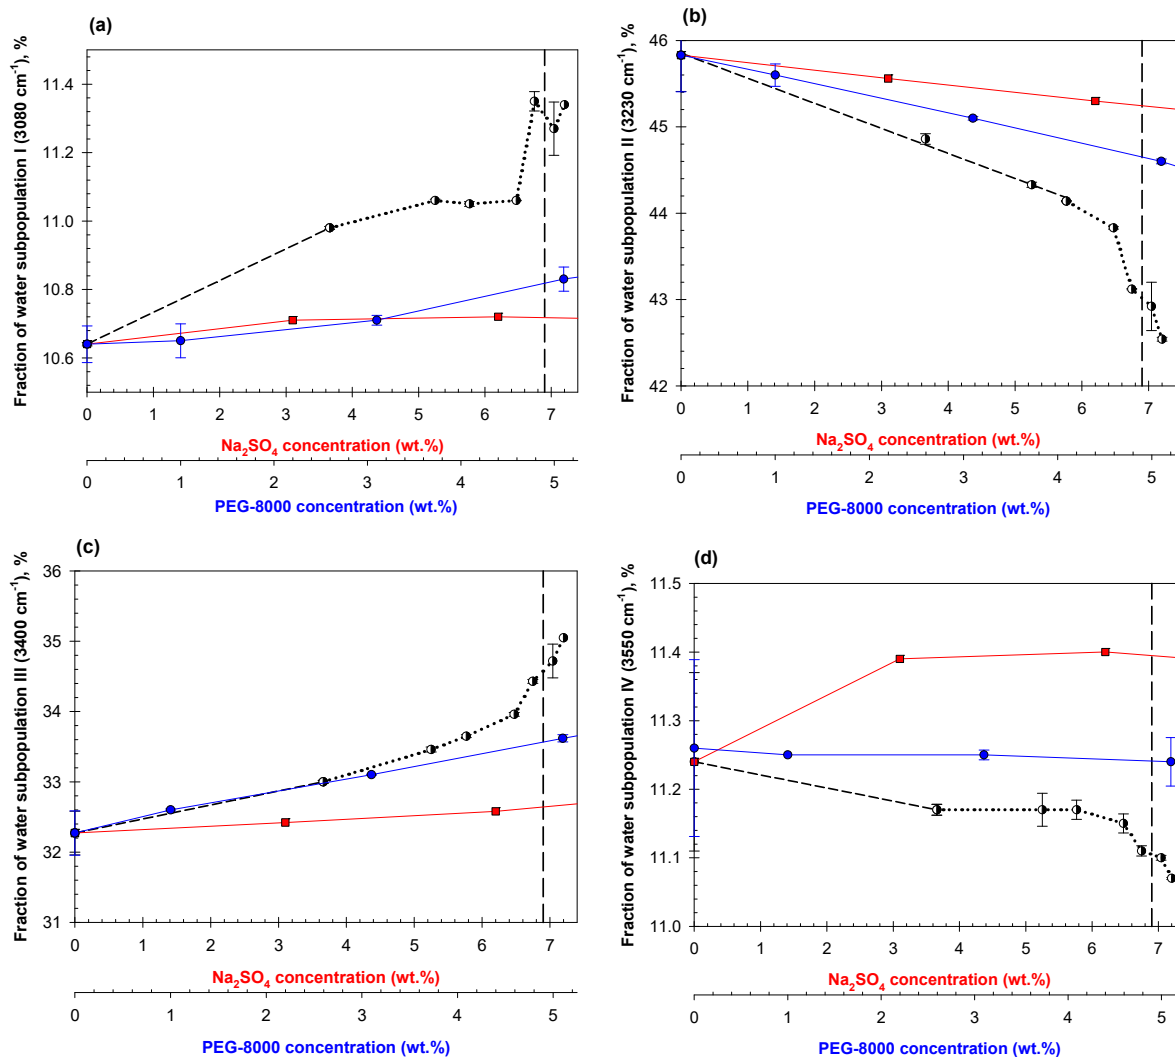

**Figure S12.** Concentration dependences of the water subpopulations fractions represented by the relative contribution of Gaussian components I (a), II (b), III (c), IV (d) on dilutions of mixed ATPS in PBS consisting of 7.2% Na<sub>2</sub>SO<sub>4</sub> / 5.1% PEG (black), Na<sub>2</sub>SO<sub>4</sub> in PBS (red squares), and PEG-8000 in PBS (blue circles). The vertical dashed line represents the estimated disruption point of this system according to its phase diagram.

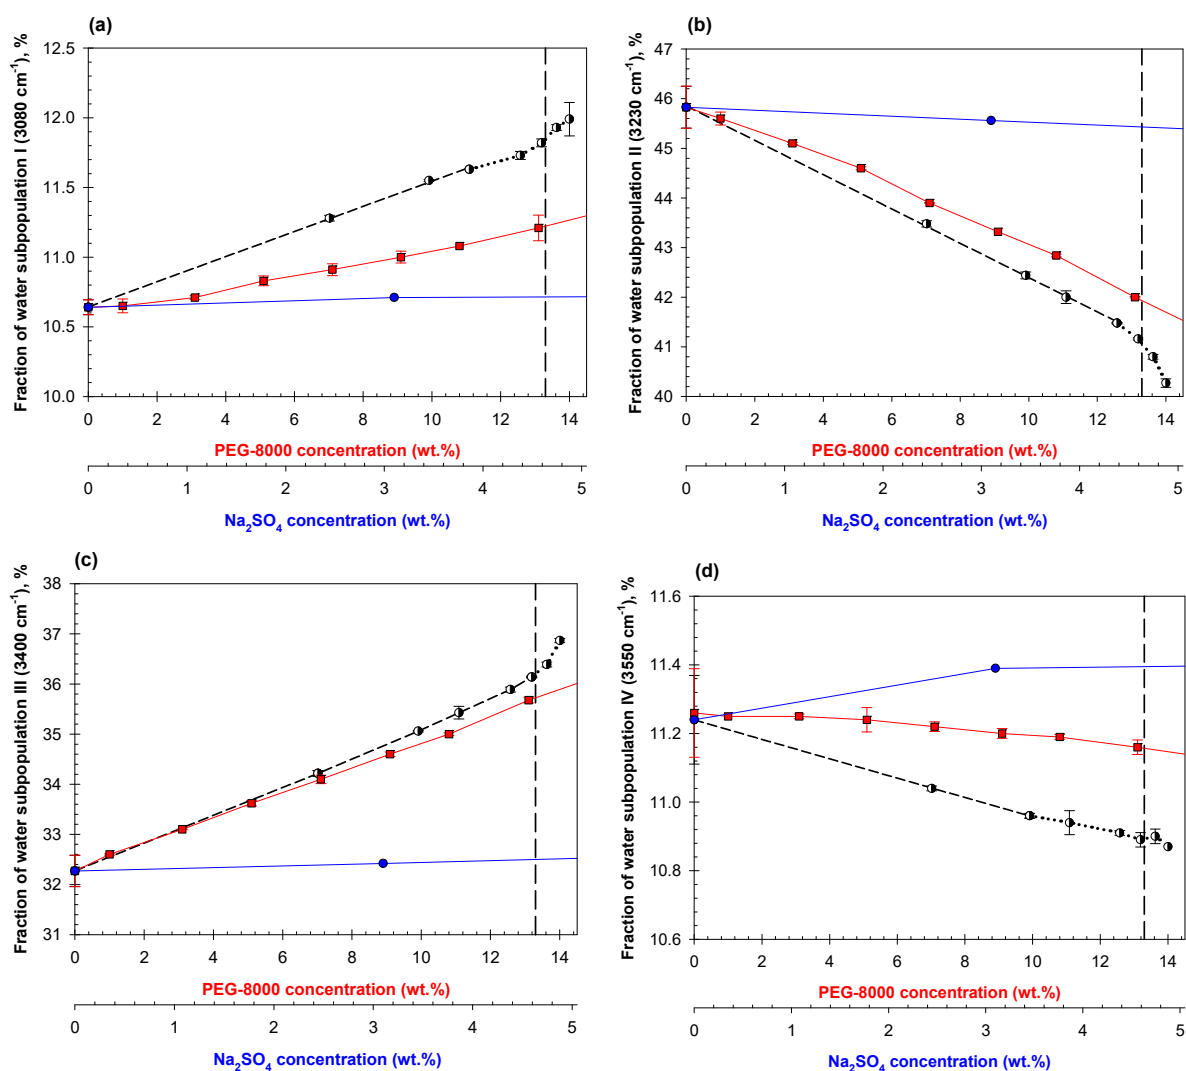

**Figure S13.** Concentration dependences of the water subpopulations fractions represented by the relative contribution of Gaussian components I (a), II (b), III (c), IV (d) on dilutions of mixed ATPS in PBS consisting of 4.5% Na<sub>2</sub>SO<sub>4</sub> / 14% PEG (black), PEG-8000 in PBS (red squares), and Na<sub>2</sub>SO<sub>4</sub> in PBS (blue circles). The vertical dashed line represents the estimated disruption point of this system according to its phase diagram.

## References

- [1] Titus, A.R., Madeira, P. P.; Ferreira, L. A.; Belgovskiy, A. I.; Mann, E. K.; Mann Jr., J. A.; Meyer, W. V.; Smart, A. E.; Uversky, V. N.; Zaslavsky, B. Y., Arrangement of hydrogen bonds in aqueous solutions of different globular proteins. *Int. J. Mol. Sci.* 2022, 23, p. 11381.
- [2] Madeira, P.P., et al., Correlations between distribution coefficients of various biomolecules in different polymer/polymer aqueous two-phase systems. *Fluid Phase Equilibria*, 2008. 267(2): p. 150-157.
